# Supplementary material for: “Plurethosome” as Vesicular System for Cutaneous Administration of Mangiferin: Formulative Study and 3D Skin Tissue Evaluation
Source: MDPI journal article supplement (doi:10.3390/pharmaceutics13081124), 2021-07-23
Supplement: s1 [file s1]

# Supplementary Materials: “Plurethosome” as Vesicular System for Cutaneous Administration of Mangiferin: Formulative Study and 3D Skin Tissue Evaluation

Maddalena Sguizzato, Francesca Ferrara, Paolo Mariani, Alessia Pepe, Rita Cortesi, Nicolas Huang, Fanny Simelière, Paola Boldrini, Anna Baldisserotto, Giuseppe Valacchi \* and Elisabetta Esposito \*

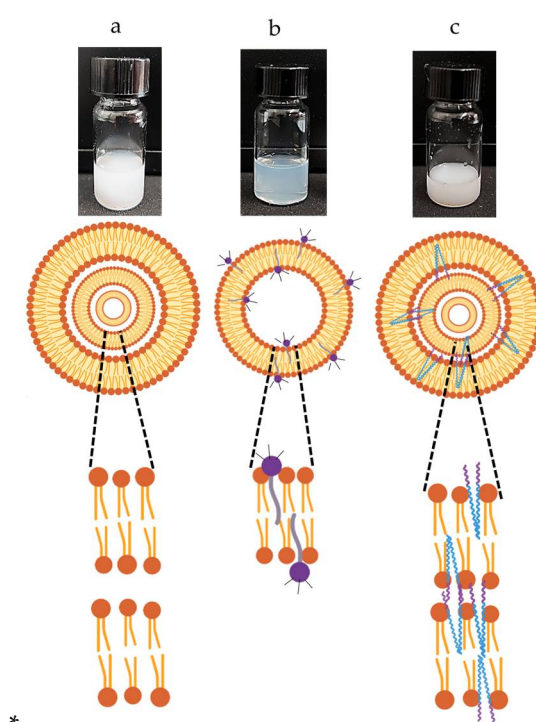

**Figure S1.** Images and hypothetical structural organization of ethosome (a), transethosome (b) and plurethosome (c).

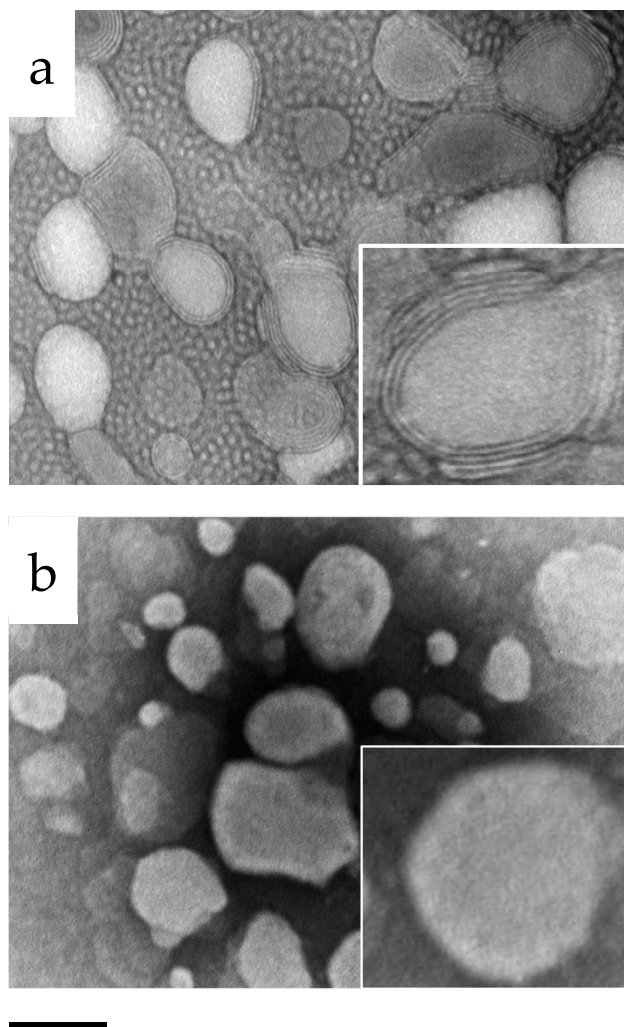

**Figure S2.** TEM images of P11 (a) and P12 (b). The bar corresponds to 250 nm in panels (a) and (b) and 100 nm in the insets.

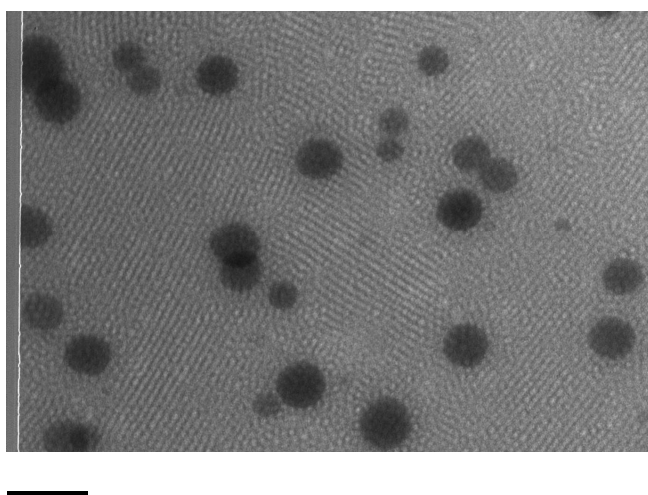

**Figure S3.** TEM image of P 1.2% aqueous solution. The bar corresponds to 50 nm.
